# Supplementary material for: Conformational analysis of PEt3 and P(OMe)3 in metal complexes
Source: Royal Society of Chemistry journal article supplement (doi:10.1039/b916065e), 2009-01-01
Supplement: b916065e.pdf [file b916065e.pdf]

## Supporting Information

**Table S1** Statistical data for bond lengths in P(OMe)<sub>3</sub> and PEt<sub>3</sub> data sets/Å

|                     | Parameter | Original Dataset        |                         |                         | After Removal of Outliers |                         |                         |
|---------------------|-----------|-------------------------|-------------------------|-------------------------|---------------------------|-------------------------|-------------------------|
|                     |           | <i>d</i> <sub>1-3</sub> | <i>d</i> <sub>4-6</sub> | <i>a</i> <sub>1-3</sub> | <i>d</i> <sub>1-3</sub>   | <i>d</i> <sub>4-6</sub> | <i>a</i> <sub>1-3</sub> |
| P(OMe) <sub>3</sub> | Maximum   | 1.958                   | 1.662                   | 115.743                 | 1.668                     | 1.593                   | 114.349                 |
|                     | Minimum   | 1.389                   | 1.000                   | 70.151                  | 1.499                     | 1.252                   | 87.173                  |
|                     | Mean      | 1.585                   | 1.422                   | 101.671                 | 1.586                     | 1.430                   | 101.682                 |
|                     | s         | 0.029                   | 0.057                   | 4.262                   | 0.023                     | 0.041                   | 4.121                   |
| PMe <sub>3</sub>    | Maximum   | 2.303                   | 1.899                   | 151.000                 | 1.961                     | 1.725                   | 114.503                 |
|                     | Minimum   | 1.477                   | 0.849                   | 63.115                  | 1.710                     | 1.289                   | 91.941                  |
|                     | Mean      | 1.833                   | 1.507                   | 103.343                 | 1.832                     | 1.516                   | 103.393                 |
|                     | s         | 0.043                   | 0.073                   | 3.842                   | 0.026                     | 0.043                   | 2.571                   |

**Table S2** Percentage of conformers in broad ( $\pm 60^\circ$ ), medium ( $\pm 40^\circ$ ) and narrow ( $\pm 20^\circ$ ) ranges of ideal conformers.

| Conformer | P(OMe) <sub>3</sub> |        |         |         | PEt <sub>3</sub> |        |         |         |
|-----------|---------------------|--------|---------|---------|------------------|--------|---------|---------|
|           | No                  | %Broad | %Medium | %Narrow | No.              | %Broad | %Medium | %Narrow |
| A         | 4                   | 100.0  | 25.0    | 0.0     | 3                | 100.0  | 100.0   | 0.0     |
| B         | 1                   | 100.0  | 0.0     | 0.0     | 49               | 100.0  | 89.8    | 73.5    |
| C         | 324                 | 100.0  | 82.1    | 51.2    | 508              | 100.0  | 98.2    | 83.1    |
| D         | 283                 | 100.0  | 71.4    | 23.3    | 100              | 100.0  | 80.0    | 20.0    |
| E         | 21                  | 100.0  | 61.9    | 9.5     | 17               | 100.0  | 94.1    | 82.4    |
| F         | 102                 | 100.0  | 92.2    | 75.5    | 1263             | 100.0  | 99.8    | 97.8    |
| G         | 0                   | -      | -       | -       | 32               | 100.0  | 98.0    | 88.3    |
| All       | 735                 | 100.0  | 78.4    | 42.3    | 1972             | 100.0  | 98.0    | 88.3    |
